# Supplementary material
Source: HighWire-hosted journal article supplement (http://dmd.aspetjournals.org/highwire/filestream/66299/field_highwire_adjunct_files/0/Supplemental_Figures_55996.pdf)
Supplement: Supplemental_Figures_55996.pdf [file Supplemental_Figures_55996.pdf]

**Title: Modeling Human Nonalcoholic Steatohepatitis-Associated Changes in Drug Transporter Expression Using Experimental Rodent Models**

Authors: Mark J. Canet, Rhiannon N. Hardwick, April D. Lake, Anika L. Dzierlenga, John D. Clarke, Nathan J. Cherrington

Journal Title: Drug Metabolism and Disposition

**Supplemental Table 1**

| Gene    | Human G $\Delta$ | Model  | Rat G $\Delta$ |
|---------|------------------|--------|----------------|
| BCRP    | 0.9668           | Athero | 1.3248         |
|         |                  | fa/fa  | 0.9749         |
|         |                  | MCD    | 4.3729         |
| MDR1A   | 0.8501           | Athero | -1.0674        |
|         |                  | fa/fa  | 0.3448         |
|         |                  | MCD    | 2.3089         |
| MDR1B   |                  | Athero | 3.8287         |
|         |                  | fa/fa  | 2.3772         |
|         |                  | MCD    | 4.0775         |
| MRP1    | 1.9526           | Athero | 1.4940         |
|         |                  | fa/fa  | -0.0244        |
|         |                  | MCD    | 2.1080         |
| MRP2    | 0.1726           | Athero | 1.8500         |
|         |                  | fa/fa  | -2.5933        |
|         |                  | MCD    | 2.3534         |
| MRP3    | 0.9156           | Athero | 3.2695         |
|         |                  | fa/fa  | 0.6078         |
|         |                  | MCD    | 4.2171         |
| MRP4    | 2.3751           | Athero | 1.5168         |
|         |                  | fa/fa  | -0.6889        |
|         |                  | MCD    | 2.8226         |
| OATP1B1 | 0.0118           | Athero | -0.0744        |
|         |                  | fa/fa  | -0.9347        |
|         |                  | MCD    | -2.7656        |
| OATP1B3 | -0.6837          | Athero | -0.0744        |
|         |                  | fa/fa  | -0.9347        |
|         |                  | MCD    | -2.7656        |

*Supplemental Table 1. Glass's  $\Delta$  in mRNA Expression of Human NASH and Rat NASH Models.* . Effect size of human transporter mRNA expression compared to effect sizes tabulated for mRNA expression of rat NASH models. Positive effect changes reflect induction of mRNA expression whereas negative effect changes reflect repression in mRNA expression. The magnitude of the values calculated represents the power of that particular model in detecting a difference in gene expression over control.

**Title: Modeling Human Nonalcoholic Steatohepatitis-Associated Changes in Drug Transporter Expression Using Experimental Rodent Models**

Authors: Mark J. Canet, Rhiannon N. Hardwick, April D. Lake, Anika L. Dzierlenga, John D. Clarke, Nathan J. Cherrington

Journal Title: Drug Metabolism and Disposition

**Supplemental Table 2**

| Gene    | Human G $\Delta$ | Model  | Mice G $\Delta$ |
|---------|------------------|--------|-----------------|
| BCRP    | 0.9668           | Athero | 0.6643          |
|         |                  | db/db  | 1.1539          |
|         |                  | MCD    | 2.0073          |
|         |                  | ob/ob  | 0.8274          |
| MDR1A   | 0.8501           | Athero | 1.1007          |
|         |                  | db/db  | 14.3532         |
|         |                  | MCD    | 5.6094          |
|         |                  | ob/ob  | 7.4741          |
| MDR1B   |                  | Athero | 0.0624          |
|         |                  | db/db  | -0.5437         |
|         |                  | MCD    | 0.2012          |
|         |                  | ob/ob  | -0.0176         |
| MRP1    | 1.9526           | Athero | -0.4296         |
|         |                  | db/db  | 1.7775          |
|         |                  | MCD    | 1.5931          |
|         |                  | ob/ob  | 0.9164          |
| MRP2    | 0.1726           | Athero | 5.4235          |
|         |                  | db/db  | 3.8863          |
|         |                  | MCD    | 4.6428          |
|         |                  | ob/ob  | 4.4081          |
| MRP3    | 0.9156           | Athero | 1.0547          |
|         |                  | db/db  | 3.7532          |
|         |                  | MCD    | 1.0913          |
|         |                  | ob/ob  | 4.0013          |
| MRP4    | 2.3751           | Athero | 1.1133          |
|         |                  | db/db  | 4.4777          |
|         |                  | MCD    | 5.8187          |
|         |                  | ob/ob  | 7.4106          |
| OATP1B1 | 0.0118           | Athero | 0.0525          |
|         |                  | db/db  | -4.1034         |
|         |                  | MCD    | -1.1830         |
|         |                  | ob/ob  | -1.7444         |
| OATP1B3 | -0.6837          | Athero | 0.0525          |
|         |                  | db/db  | -4.1034         |
|         |                  | MCD    | -1.1830         |
|         |                  | ob/ob  | -1.7444         |

*Supplemental Table 2. Glass's  $\Delta$  in mRNA Expression of Human NASH and Mouse NASH Models.* . Effect size of human transporter mRNA expression compared to effect sizes tabulated for mRNA expression of mouse NASH models. Positive effect changes reflect induction of mRNA expression whereas negative effect changes reflect repression in mRNA expression. The magnitude of the values calculated represents the power of that particular model in detecting a difference in gene expression over control.

**Title: Modeling Human Nonalcoholic Steatohepatitis-Associated Changes in Drug Transporter Expression Using Experimental Rodent Models**

Authors: Mark J. Canet, Rhiannon N. Hardwick, April D. Lake, Anika L. Dzierlenga, John D. Clarke, Nathan J. Cherrington

Journal Title: Drug Metabolism and Disposition

**Supplemental Table 3**

| Gene    | Human G $\Delta$ | Model  | Rat G $\Delta$ |
|---------|------------------|--------|----------------|
| BCRP    | 1.2878           | Athero | -0.2987        |
|         |                  | fa/fa  | -1.2807        |
|         |                  | MCD    | 0.7470         |
| MRP2    | 0.9153           | Athero | 0.6560         |
|         |                  | fa/fa  | -0.0205        |
|         |                  | MCD    | 3.3401         |
| MRP3    | 1.0801           | Athero | -0.8147        |
|         |                  | fa/fa  | 0.7428         |
|         |                  | MCD    | 4.3816         |
| MRP4    | 1.1151           | Athero | 0.7763         |
|         |                  | fa/fa  | 1.9884         |
|         |                  | MCD    | 3.2338         |
| OATP1B1 | 1.552            | Athero | -1.9403        |
|         |                  | fa/fa  | 2.0365         |
|         |                  | MCD    | -3.2784        |
| OATP1B3 | -1.861           | Athero | -1.9403        |
|         |                  | fa/fa  | 2.0365         |
|         |                  | MCD    | -3.2784        |
| PGP     | 1.2755           | Athero | 1.7635         |
|         |                  | fa/fa  | -0.1348        |
|         |                  | MCD    | 2.2404         |

*Supplemental Table 3. Glass's  $\Delta$  in Protein Expression of Human NASH and Rat NASH Models.* Effect size of human transporter protein expression compared to effect sizes tabulated for protein expression of rat NASH models. Positive effect changes reflect induction of protein expression whereas negative effect changes reflect repression in protein expression. The magnitude of the values calculated represents the power of that particular model in detecting a difference in protein expression over control

**Title: Modeling Human Nonalcoholic Steatohepatitis-Associated Changes in Drug Transporter Expression Using Experimental Rodent Models**

Authors: Mark J. Canet, Rhiannon N. Hardwick, April D. Lake, Anika L. Dzierlenga, John D. Clarke, Nathan J. Cherrington

Journal Title: Drug Metabolism and Disposition

**Supplemental Table 4**

| Gene    | Human G $\Delta$ | Model  | Mice G $\Delta$ |
|---------|------------------|--------|-----------------|
| BCRP    | 1.2878           | Athero | 1.1488          |
|         |                  | db/db  | -0.4542         |
|         |                  | MCD    | -2.2921         |
|         |                  | ob/ob  | 0.7902          |
| MRP2    | 0.9153           |        |                 |
| MRP3    | 1.0801           | Athero | -0.1936         |
|         |                  | db/db  | 1.7243          |
|         |                  | MCD    | 0.3446          |
|         |                  | ob/ob  | 1.6854          |
| MRP4    | 1.1151           | Athero | -0.6641         |
|         |                  | db/db  | 1.8107          |
|         |                  | MCD    | 2.0786          |
|         |                  | ob/ob  | 1.7429          |
| OATP1B1 | 1.552            | Athero | 0.4204          |
|         |                  | db/db  | -4.9064         |
|         |                  | MCD    | -5.0646         |
|         |                  | ob/ob  | -3.5524         |
| OATP1B3 | -1.861           | Athero | 0.4204          |
|         |                  | db/db  | -4.9064         |
|         |                  | MCD    | -5.0646         |
|         |                  | ob/ob  | -3.5524         |
| PGP     | 1.2755           | Athero | 0.9611          |
|         |                  | db/db  | 1.8784          |
|         |                  | MCD    | 0.0050          |
|         |                  | ob/ob  | 2.1669          |

*Supplemental Table 4. Glass's  $\Delta$  in Protein Expression of Human NASH and Mouse NASH Models.* . Effect size of human transporter protein expression compared to effect sizes tabulated for protein expression of mouse NASH models. Positive effect changes reflect induction of protein expression whereas negative effect changes reflect repression in protein expression. The magnitude of the values calculated represents the power of that particular model in detecting a difference in protein expression over control.
